# Supplementary material for: Increasing Anthropogenic Disturbance Restricts Wildebeest Movement Across East African Grazing Systems
Source: Frontiers journal article supplement (doi:10.3389/fevo.2022.846171), 2022-03-15
Supplement: Table_1.XLSX [file Table_1.XLSX]

## Sheet: TableS1
Table S1: Summary of GPS collared white-bearded wildebeest (Connochaetes taurinus) monitored across three study areas in southern Kenya. Shown are 95% confidence intervals for estimable parameters in parentheses. Age estimated from tooth wear at the time of animal capture. Total Movement and Maximum Displacement based on straight-line displacements between GPS positions. Home Range Crossing Times…
ID	Sex	Age	Study Area	Start Date	End Date	Days Tracked	Fixes Received	Fix Success (%)	Residenta	Total Movement (km)	Maximum Displacement (km)	Modelb	Home range crossing time (days)	Directional Persistence (minutes)	Average distance traveled (km/day)
2837	M	9	Amboseli Basin	2010-10-11 07:00:21	2011-07-08 06:00:02	270	4119	95.35	N	2023.31	44.44	OUF anisotropic	23.59 (9.35-59.54)	28.84 (26.93-30.88)	19.2 (18.66-19.74)
30069	F	10	Amboseli Basin	2010-10-12 06:00:21	2012-10-08 21:01:20	728	11102	95.33	N	6197.77	61.75	OUF anisotropic	21.27 (13.94-32.47)	35.05 (33.8-36.35)	21.05 (20.77-21.33)
30073	F	7	Amboseli Basin	2010-10-10 14:00:22	2013-01-15 11:00:10	828	12665	95.61	N	5604.38	25.76	OUF anisotropic	3.97 (3.41-4.62)	34.63 (33.41-35.9)	16.41 (16.19-16.63)
30075	F	6	Amboseli Basin	2010-10-10 14:00:09	2012-04-07 09:01:47	545	7992	91.69	Y	3023.72	41.68	OUF anisotropic	28.68 (15.14-54.31)	43.19 (41.47-44.98)	13.36 (13.15-13.57)
30076	F	10	Amboseli Basin	2010-10-11 14:00:11	2012-10-29 00:00:53	748	11525	96.24	N	5895.94	52.11	OUF anisotropic	50.38 (23.87-106.32)	33.3 (32.11-34.54)	19.02 (18.81-19.23)
30078	F	10	Amboseli Basin	2010-10-11 17:00:43	2011-02-16 03:00:54	127	1937	95.09	N	1146.14	56.8	OUF anisotropic	30.34 (0.79-1157.92)	29.92 (26.99-33.17)	22.9 (22.19-23.62)
30081	M	8	Amboseli Basin	2010-10-10 17:00:50	2010-12-12 10:00:15	63	1001	99.9	N	872.05	34.42	OUF anisotropic	10.02 (1.83-54.97)	57.57 (51.62-64.21)	26.07 (25.49-26.66)
30083	M	9	Amboseli Basin	2010-10-12 03:00:43	2011-06-01 00:01:12	232	3536	95.26	N	2502.52	31.37	OUF anisotropic	11.16 (6.14-20.31)	31.62 (29.49-33.92)	25.93 (25.24-26.63)
30085	M	8	Amboseli Basin	2010-10-11 21:01:14	2012-06-10 21:03:38	608	8515	87.52	Y	5547.79	54.06	OUF anisotropic	25.28 (14.77-43.28)	36.67 (35.2-38.21)	25.23 (24.97-25.5)
2840	M	6	Athi-Kaputiei Plains	2010-10-15 16:00:14	2011-09-13 08:01:18	333	4802	90.25	Y	1628.17	30.03	OUF anisotropic	7.55 (5.19-10.99)	25.13 (23.4-26.99)	13.7 (13.31-14.1)
2842	M	5	Athi-Kaputiei Plains	2010-10-15 21:01:14	2012-03-17 18:00:30	519	7804	93.98	Y	2467.44	13.19	OUF anisotropic	2.33 (2.01-2.7)	20.76 (19.39-22.22)	13.78 (13.38-14.19)
30068	F	9	Athi-Kaputiei Plains	2010-10-16 17:00:43	2010-12-25 00:00:50	69	1107	99.91	Y	323.99	5.49	OUF anisotropic	0.64 (0.5-0.81)	17.38 (13.43-22.5)	13.07 (12.13-14.03)
30070	F	8	Athi-Kaputiei Plains	2010-10-20 17:00:15	2011-06-14 00:01:02	236	3568	94.39	N	1037.83	34.6	OUF anisotropic	16.66 (7.51-36.98)	17.28 (15.42-19.36)	17.67 (16.94-18.41)
30071	F	9	Athi-Kaputiei Plains	2010-10-19 15:00:24	2013-01-11 07:00:13	815	12373	94.94	Y	2759.09	23.52	OUF anisotropic	11.27 (8.62-14.73)	11.9 (10.84-13.07)	12.98 (12.44-13.53)
30072	F	9	Athi-Kaputiei Plains	2010-10-18 18:00:07	2012-10-19 21:01:17	732	11081	94.6	Y	2386.66	7.18	OUF anisotropic	0.75 (0.7-0.81)	15.85 (14.68-17.11)	9.96 (9.7-10.22)
30074	F	9	Athi-Kaputiei Plains	2010-10-16 15:00:21	2013-01-15 15:00:54	822	11763	89.43	Y	2891.86	25.39	OUF anisotropic	2.59 (2.29-2.92)	16.75 (15.67-17.9)	13.85 (13.42-14.28)
30077	F	10	Athi-Kaputiei Plains	2010-10-19 11:00:47	2012-11-20 15:00:42	763	11790	96.54	N	3182.42	34.1	OUF anisotropic	46.08 (23.07-92.03)	24.01 (22.88-25.19)	12.39 (12.08-12.7)
30079	F	9	Athi-Kaputiei Plains	2010-10-21 00:01:12	2012-10-17 09:01:23	727	10982	94.36	Y	3187.81	38.19	OU anisotropic	38.61 (18.35-81.21)	-	-
30082	M	10	Athi-Kaputiei Plains	2010-10-17 16:00:41	2013-01-15 17:00:11	821	12583	95.78	Y	2556.02	22.85	OUF anisotropic	7.98 (6.41-9.95)	22.88 (21.81-24.01)	8.17 (8.03-8.32)
30084	M	8	Athi-Kaputiei Plains	2010-10-19 03:00:43	2011-12-08 11:02:25	415	6070	91.32	Y	1794.09	6.65	OUF anisotropic	1.63 (1.41-1.88)	10.13 (8.46-12.13)	17.13 (15.52-18.77)
30086	M	10	Athi-Kaputiei Plains	2010-10-16 15:00:31	2012-02-05 21:01:24	477	7342	96.14	Y	1634.38	11.42	OU anisotropic	1.63 (1.43-1.85)	-	-
2829	F	9	Mara	2010-05-28 09:00:17	2012-06-21 12:00:27	755	11543	95.52	Y	4177.85	40.52	OUF anisotropic	120.02 (20.74-694.59)	29.15 (28.01-30.33)	13.56 (13.43-13.69)
2830	F	10	Mara	2010-05-28 06:00:21	2010-08-18 00:02:16	82	1311	100	Y	333.19	6.61	OUF anisotropic	2.71 (1.6-4.58)	4.78 (0.52-43.82)	20.57 (12.41-29.69)
2831	M	5	Mara	2010-05-26 03:00:49	2012-06-13 18:00:36	750	11437	95.32	Y	3042.05	26.74	OUF anisotropic	7.18 (5.7-9.03)	19.21 (18.15-20.34)	11.62 (11.43-11.82)
2832	F	8	Mara	2010-05-27 18:05:42	2013-01-15 16:00:17	964	14792	95.91	Y	5353.97	25.67	OUF anisotropic	19.11 (13.69-26.67)	21.67 (20.71-22.69)	14.7 (14.5-14.9)
2833	F	7	Mara	2010-05-28 07:00:55	2011-03-18 18:01:20	294	4422	93.77	Y	1384.25	8.15	OUF anisotropic	1.57 (1.33-1.86)	20.6 (18.82-22.55)	13.23 (12.85-13.62)
2834	F	7	Mara	2010-05-30 03:00:43	2011-12-18 10:00:47	567	8718	96.03	N	4257.45	205.44	OUF anisotropic	1134.1 (0-3057.69)	35.56 (34.14-37.04)	17.6 (17.35-17.85)
2835	F	10	Mara	2010-05-26 21:01:20	2010-11-24 21:01:17	182	2863	98.28	Y	617.36	9.41	OUF anisotropic	2.35 (1.8-3.08)	20.21 (18.04-22.64)	8.19 (7.86-8.53)
2836	M	9	Mara	2010-05-30 08:00:17	2012-12-10 15:02:25	925	11744	79.31	Y	4676.11	64.08	OUF anisotropic	85.82 (29.76-247.47)	37.03 (35.74-38.36)	14.94 (14.76-15.12)
2838	F	12	Mara	2010-05-29 09:00:54	2011-03-12 21:01:14	288	4337	94.22	N	1747.87	76.89	OUF anisotropic	142.6 (0-318.88)	39.74 (37.57-42.04)	13.69 (13.48-13.89)
2839	M	10	Mara	2010-05-26 06:00:26	2011-09-27 21:01:26	490	7203	91.9	Y	2283.22	29.73	OUF anisotropic	15.03 (9.6-23.54)	24.86 (23.44-26.37)	14.16 (13.87-14.45)
2841	M	8	Mara	2010-05-29 03:00:43	2010-06-14 13:03:09	16	243	91.7	--	87.73	3.35	OU anisotropic	0.1 (0.08-0.13)	-	-
2843	F	12	Mara	2010-05-27 07:00:39	2011-03-28 17:00:25	305	4625	94.56	N	1562.6	21.19	OUF anisotropic	15.6 (8.33-29.24)	19.9 (18.19-21.77)	14.52 (14.15-14.9)
2844	F	7	Mara	2010-05-27 06:00:21	2013-01-15 08:00:27	964	14872	96.4	Y	3915.64	16.54	OUF anisotropic	2.53 (2.26-2.82)	15.37 (14.36-16.45)	12.08 (11.78-12.39)
2845	F	8	Mara	2010-05-29 03:00:26	2012-05-24 18:00:09	727	11096	95.41	N	4197.02	138.05	OUF anisotropic	389.71 (0-862.76)	23.07 (21.96-24.25)	16.78 (16.42-17.13)
2846	M	10	Mara	2010-05-25 21:01:17	2011-08-11 14:00:45	443	6855	96.77	Y	2177.68	25.16	OUF anisotropic	5.06 (3.93-6.5)	24.58 (23.14-26.12)	13.07 (12.77-13.36)
aResidency assessed via variogram inspection. Not assessed for animal 2841 due to short monitoring period.
bOrnstein-Uhlenbeck (OU) and Ornstein-Uhlenbeck with foraging (OUF) models. Detailed model descriptions can be found in Fleming et al. (2014).
- Parameter unestimable
