# Supplementary material for: Increasing Anthropogenic Disturbance Restricts Wildebeest Movement Across East African Grazing Systems
Source: Frontiers journal article supplement (doi:10.3389/fevo.2022.846171), 2022-03-15
Supplement: Table_2.XLSX [file Table_2.XLSX]

## Sheet: TableS2
Table S2: Candidate model rankings for predicting average speed in white-bearded wildebeest (Connochates taurinus) across three study areas (Amboseli Basin, Athi-Kaputiei Plains, Mara) in southern Kenya. Best model (additive) highlighted in bold.
Model		DIC	ΔDICa	Bayesian p-value
	NDVI + Anthropogenic Footprint	176.163	0	0.502
	NDVI * Anthropogenic Footprint	177.019	0.856	0.504
	NDVI	186.777	10.614	0.495
	Anthropogenic Footprint	194.209	18.046	0.494
aDifference in value between the Deviance Information Criterion (DIC) of the current and best model.
